# Supplementary material for: Metrics and Evaluation Tools for Patient Engagement in Healthcare Organization- and System-Level Decision-Making: A Systematic Review
Source: PubMed Central journal article supplement (PMC6186472; doi:10.15171/ijhpm.2018.43), 2018-05-16
Supplement: ijhpm-7-889-s003.pdf [file ijhpm-7-889-s003.pdf]

**Supplementary file 3.** List of all publications included in the qualitative analysis to develop the taxonomy (excluding those containing P2C2 engagement evaluation tools, which are in Table 1).

- Abelson, J., Montesanti, S., Li, K., Gauvin, F., & Martin, E. (2010). *Effective strategies for interactive public engagement in the development of healthcare policies and programs*. Canadian Health Services Research Foundation.
- Abelson, J., Forest, P. G., Eyles, J., Smith, P., Martin, E., & Gauvin, F. P. (2003). Deliberations about deliberative methods: Issues in the design and evaluation of public participation processes. *Social Science & Medicine* (1982), 57(2), 239-251.
- Abelson, J., Forest, P., Eyles, J., Casebeer, A., Martin, E., & Mackean, G. (2007). Examining the role of context in the implementation of a deliberative public participation experiment: Results from a Canadian comparative study. *Social Science & Medicine*, 64(10), 2115-2128.
- Abelson, J., & Gauvin, F. (2008). *Assessing the impacts of public participation: Concepts, evidence and policy implications*. Unpublished manuscript.
- Alberta Health Services Engagement and Patient Experience Department. (2014). *A resource toolkit for engaging patient and families at the planning table*. Alberta Health Services.
- Alborz A., Wilkin D., & Smith K. (2002). Are primary care groups and trusts consulting local communities? *Health and Social Care in the Community*, 10(1), 20-28.
- Allsop J., & Jones K. (2002). Patient involvement. Hearing voices. *Health Service Journal*, 112(5798), 28-29.
- Allsop J., & Taket A. (2003). Evaluating user involvement in primary healthcare. *International Journal of Healthcare Technology and Management*, 5(1-2), 34-44.
- Amaro, H., McGuire, J., Hardy-Fanta, C., & Weissman, G. (1999). Participation of latino community-based organizations in the RWCA process: A study of two metropolitan areas. *Free Inquiry in Creative Sociology*, 27(2), 29-44.
- Anton S., McKee L., Harrison S., & Farrar S. (2007). Involving the public in NHS service planning. *Journal of Health, Organisation and Management*, 21(4-5), 470-483.
- Armstrong, N., Herbert, G., Aveling, E., Dixon-Woods, M., & Martin, G. (2013). Optimizing patient involvement in quality improvement. *Health Expectations: An International Journal of Public Participation in Health Care & Health Policy*, 16(3), e36-e47.
- Barker M., & Klopper H. (2007). Community participation in primary health care projects of the Muldersdrift health and development programme. *Curationis*, 30(2), 36-47.
- Barnett, P., Tenbenschel, T., Cumming, J., Clayden, C., Ashton, T., Pledger, M., & Burnette, M. (2009). Implementing new modes of governance in the New Zealand health system: An empirical study. *Health Policy*, 93(2-3), 118-127.
- Bath J., & Wakerman J. (2015). Impact of community participation in primary health care: What is the evidence? *Australian Journal of Primary Health*, 21(1), 2-8.
- Baum F., Sanderson C., & Jolley G. (1997). Community participation in action: An analysis of the South Australian health and social welfare councils. *Health Promotion International*, 12(2), 125-134.
- Bellin, L. E., Kavalier, F., & Schwarz, A. (1972). Phase one of consumer participation in policies of 22 voluntary hospitals in New York City. *American Journal of Public Health*, 62(10), 1370-1378.
- Bichmann, W., Rifkin, S. B., & Shrestha, M. (1989). Towards the measurement of community participation. *World Health Forum*, 10(3-4), 467-472.

- Boivin, A., Lehoux, P., Lacombe, R., Burgers, J., & Grol, R. (2014). Involving patients in setting priorities for healthcare improvement: A cluster randomized trial. *Implementation Science*, 9, 24-5908-9-24.
- Boulton, A., Simonsen, K., Walker, T., Cumming, J., & Cunningham, C. (2004). Indigenous participation in the 'new' New Zealand health structure. *Journal of Health Services Research & Policy*, 9 Suppl 2, 35-40.
- Bowl, R. (1996). Involving service users in mental health services: Social services departments and the National Health Service and Community Care Act 1990. *Journal of Mental Health*, 5(3), 287-303.
- Bradbury, R. C. (1972). A comprehensive health planning board of directors. *Health Services Reports*, 87(10), 905-908.
- Briggs, H. E. (1996). Creating independent voices: The emergence of state wide family advocacy networks. *Journal of Mental Health Administration*, 23(4), 447-457.
- Bryant J., Saxton M., Madden A., Bath N., & Robinson S. (2008). Consumer participation in the planning and delivery of drug treatment services: The current arrangements. *Drug and Alcohol Review*, 27(2), 130-137.
- Buck, D. S., Rochon, D., Davidson, H., McCurdy, S., & Committee of Healthcare for the Homeless--Houston. (2004). Involving homeless persons in the leadership of a health care organization. *Qualitative Health Research*, 14(4), 513-525.
- Burns, D., & Taylor, M. (2000). *Auditing community participation: An assessment handbook*. Great Britain: Policy Press.
- Butterfoss, F. D. (2006). Process evaluation for community participation. *Annual Review of Public Health*, 27, 323-340.
- Canadian Institutes of Health Research Partnerships and Citizen Engagement Branch. (2012). *CIHR's framework for citizen engagement*. Canadian Institutes of Health Research.
- Cancer Australia and Cancer Voices Australia. (2011). *National framework for consumer involvement in cancer control*. Canberra, ACT: Cancer Australia.
- Carman, K., Heeringa, J., Heil, S., Garfinkel, S., Windham, A., Gilmore, D., . . . Pathak-Sen, E. (2013). *Use of public deliberation in eliciting public input: Findings from a literature review*. Rockville, MD: Agency for Healthcare Research and Quality.
- Carman, K., Maurer, M., Mallery, C., Wang, G., Garfinkel, S., Richmond, J., . . . Fratto, A. (2014). *Community forum deliberative methods demonstration: Evaluating effectiveness and eliciting public views on use of evidence*. Rockville, MD: Agency for Healthcare Research and Quality.
- Carman, K. L., Dardess, P., Maurer, M., Sofaer, S., Adams, K., Bechtel, C., & Sweeney, J. (2013). Patient and family engagement: A framework for understanding the elements and developing interventions and policies. *Health Affairs*, 32(2), 223-231.
- Cashin, C., Scheffler, R., Felton, M., Adams, N., & Miller, L. (2008). Transformation of the California mental health system: Stakeholder-driven planning as a transformational activity. *Psychiatric Services*, 59(10), 1107-1114.
- Chafe, R., Neville, D., Rathwell, T., & Deber, R. (2008). A framework for involving the public in health care coverage and resource allocation decisions. *Healthcare Management Forum*, 21(4), 6-21.
- Champeau D.A., & Shaw S.M. (2002). Power, empowerment, and critical consciousness in community collaboration: Lessons from an advisory panel for an HIV awareness media campaign for women. *Women Health*, 36(3), 31-50.
- Charles, C., & DeMaio, S. (1993). Lay participation in health care decision making: A conceptual framework. *Journal of Health Politics, Policy and Law*, 18(4), 881-904.

- Chesney, J. D. (1982). Strategies for building representative HSAs: The impact of legal structure. *Journal of Health Politics, Policy and Law*, 7(1), 96-110.
- Chessie, K. (2009). Health system regionalization in Canada's provincial and territorial health systems: Do citizen governance boards represent, engage, and empower? *International Journal of Health Services: Planning, Administration, Evaluation*, 39(4), 705-724.
- Chilaka, M. A. (2005). Ascribing quantitative value to community participation: A case study of the roll back malaria (RBM) initiative in five African countries. *Public Health*, 119(11), 987-994.
- Chung, P., Grogan, C. M., & Mosley, J. E. (2012). Residents' perceptions of effective community representation in local health decision-making. *Social Science & Medicine*, 74(10), 1652-1659.
- Coad, J., Flay, J., Aspinall, M., Bilverstone, B., Coxhead, E., & Hones, B. (2008). Evaluating the impact of involving young people in developing children's services in an acute hospital trust. *Journal of Clinical Nursing*, 17(23), 3115-3122.
- Conklin, A., Morris, Z. S., & Nolte, E. (2010). *Involving the public in healthcare policy: An update of the research evidence and proposed evaluation framework*. Santa Monica, CA: RAND Corporation.
- Conklin, A., Morris, Z., & Nolte, E. (2015). What is the evidence base for public involvement in health-care policy?: Results of a systematic scoping review. *Health Expectations: An International Journal of Public Participation in Health Care and Health Policy*, 18(2), 153-165.
- Connor, H. (1999). Collaborative or chaos: A consumer perspective. *Australian & New Zealand Journal of Mental Health Nursing*, 8(3), 79-85.
- Crawford, M., Rutter, D., & Thelwell, S. (2003). *User involvement in change management: A review of the literature*. London: NCCSDO.
- Crawford, M. J., Rutter, D., Manley, C., Weaver, T., Bhui, K., Fulop, N., & Tyrer, P. (2002). Systematic review of involving patients in the planning and development of health care. *British Medical Journal*, 325(7375), 1263-1265.
- Crowley, P., Green, J., Freake, D., & Drinkwater, C. (2002). Primary care trusts involving the community: Is community development the way forward? *Journal of Management in Medicine*, 16(4-5), 311-322.
- Culyer, A. J. (2005). Involving stakeholders in healthcare decisions - the experience of the National Institute for Health and Clinical Excellence (NICE) in England and Wales. *Healthcare Quarterly*, 8(3), 56-60.
- Davidson, J., Wiens, S., & Anderson, K. (2010). Creating a provincial family council to engage youth and families in child & youth mental health systems. *Journal of the Canadian Academy of Child and Adolescent Psychiatry*, 19(3), 169-175.
- Davies, C., Wetherell, M., & Barnett, E. (2006). *Citizens at the centre: Deliberative participation in healthcare decision*. Bristol: Policy Press.
- Davies, C., Wetherell, M., Barnett, E., & Seymour-Smith, S. (2005). *Opening the box: Evaluating the citizens council of NICE*. The Open University.
- Davies, K., Gray, M., & Webb, S. A. (2014). Putting the parity into service-user participation: An integrated model of social justice. *International Journal of Social Welfare*, 23(2), 119-127.
- Davis, T. R. V., & Specht, P. S. (1978). Citizen participation in community mental-health programs: A study in intergroup conflict and cooperation. *Group and Organization Studies*, 3(4), 456-466.
- Dawson M.T. (2004). The role of consumer participation in Victorian primary care partnerships. *Australian Journal of Primary Health*, 10(2), 134-143.
- Deng, C., & Wu, C. (2010). An innovative participatory method for newly democratic societies: The 'civic groups forum' on national health insurance reform in Taiwan. *Social Science & Medicine*, 70(6), 896-903.

- Diamond B., Parkin G., Morris K., Bettinis J., & Bettesworth C. (2003). User involvement: Substance or spin? *Journal of Mental Health, 12*(6), 613-626.
- Donchin M., Shemesh A.A., Horowitz P., & Daoud N. (2006). Implementation of the healthy cities' principles and strategies: An evaluation of the Israel healthy cities network. *Health Promotion International, 21*(4), 266-273.
- El Ansari, W., & Phillips C.J. (2004). The costs and benefits to participants in community partnerships: A paradox? *Health Promotion Practice, 5*(1), 35-48.
- European Patient's Forum. (2011). *Patient involvement in health technology assessment in Europe: Results of the EPF survey*. European Patient's Forum.
- Eyre, R., & Gauld, R. (2003). Community participation in a rural community health trust: The case of Lawrence, New Zealand. *Health Promotion International, 18*(3), 189-197.
- Ferreira, K., Hodges, S., & Slaton, E. (2013). The promise of family engagement: An action plan for system-level policy and advocacy. In A. McDonald Culp, & A., pp. 253-268. New York, NY, US: Springer Science + Business Media.
- Flower J., & Wirz S. (2000). Rhetoric or reality? The participation of disabled people in NGO planning. *Health Policy and Planning, 15*(2), 177-185.
- Frankish, C. J., Kwan, B., Ratner, P. A., Higgins, J. W., & Larsen, C. (2002). Challenges of citizen participation in regional health authorities. *Social Science & Medicine, 54*(10), 1471-1480.
- Frumence, G., Nyamhanga, T., Mwangu, M., & Hurtig, A. K. (2014). Participation in health planning in a decentralised health system: Experiences from facility governing committees in the Kongwa district of Tanzania. *Global Public Health, 9*(10), 1125-1138.
- Fudge, N., Wolfe, C. D. A., & McKeivitt, C. (2008). Assessing the promise of user involvement in health service development: Ethnographic study. *British Medical Journal, 336*(7639), 313-317.
- Gagliardi A.R., Lemieux-Charles L., Brown A.D., Sullivan T., & Goel V. (2008). Barriers to patient involvement in health service planning and evaluation: An exploratory study. *Patient Education and Counseling, 70*(2), 234-241.
- Garney W.R., Drake K., Wendel M.L., McLeroy K., Clark H.R., & Ryder B. (2013). Increasing access to care for Brazos valley, Texas: A rural community of solution. *Journal of the American Board of Family Medicine, 26*(3), 246-253.
- Gauvin, F., Abelson, J., Giacomini, M., Eyles, J., & Lavis, J. N. (2010). "It all depends": Conceptualizing public involvement in the context of health technology assessment agencies. *Social Science & Medicine, 70*(10), 1518-1526.
- Gilbert D. (2003). Nothing about us without us: What patient and public involvement means to CHI. *Quality in Primary Care, 11*(1), 61-65.
- Gilbert, D., Lloyd, P., Hampton, K., Rennie, R., & Havinden, J. (2001). *Signposts: A practical guide to public and patient involvement in Wales*. OPM/National Assembly for Wales.
- Gold, S. K., Abelson, J., & Charles, C. A. (2005). From rhetoric to reality: Including patient voices in supportive cancer care planning. *Health Expectations, 8*(3), 195-209.
- Grant, J., Sears, N. A., & Born, K. (2008). Public engagement and the changing face of health system planning. *Healthcare Management Forum, 21*(4), 22-26.
- Greer, A. L. (1976). Training board members for health planning agencies. A review of the literature. *Public Health Reports, 91*(1), 56-61.
- Gurung, G., & Tuladhar, S. (2013). Fostering good governance at peripheral public health facilities: An experience from Nepal. *Rural and Remote Health, 13*(2), 2042.

- Harrington, A. D. (2008). Evaluating community participation in health care decision-making: The case of the Airdrie/North Rocky view health needs project. *Theses and Dissertations (Comprehensive)*. Paper 866.
- Hausner, T., Johnson, F. T., Jr, & Sevick, J. R. (1982). Factors affecting representation of minorities and the disadvantaged in health planning agencies. *Journal of Health and Human Resources Administration*, 5(2), 133-144.
- Health Research & Educational Trust. (2015). *Partnering to improve quality and safety: A framework for working with patient and family advisors*. Chicago, IL: Health Research & Educational Trust.
- Heller, K., Price, R. H., Reinhartz, S., Riger, S., & Wandersman, A. (1984). *Psychology and community change: Challenges of the future* (Second Edition). Pacific Grove, CA: Brooks/Cole Publishing Company.
- Hessler, R. M. (1977). Citizen participation, social organization, and culture: A neighborhood health center for chicanos. *Human Organization*, 36(2), 124-134.
- Howard-Grabman, L. (2000). Bridging the gap between communities and service providers: Developing accountability through community mobilisation approaches. *IDS Bulletin*, 31(1), 88-96.
- Howe, D., Batchelor, S., & Bochynska, K. (2011). Finding our way: Youth participation in the development and promotion of youth mental health services on the NSW Central Coast. *Advances in Mental Health*, 10(1), 20-28.
- Institute for Patient- and Family-Centered Care. (2016). *Advancing the practice of patient- and family-centered care in primary care and other ambulatory settings: How to get started....* Institute for Patient- and Family-Centered Care.
- Jagananen, P., & Kortebout, E. (1999). Stimulating community participation in a group of farm workers using action research. *Curationis*, 22(1), 36-41.
- Jain A. (2015). Patient communities reform healthcare in India. *British Medical Journal*, 350:h225.
- Johns, S., Kilpatrick, S., & Whelan, J. (2007). Our health in our hands: Building effective community partnerships for rural health service provision. *Rural Society*, 17(1), 50-65.
- Johnson A., & Silburn K. (2000). Community and consumer participation in Australian health services - an overview of organisational commitment and participation processes. *Australian Health Review*, 23(3), 113-121.
- Johnson A.E., Beacham B., Moretti C., & Wishart J. (2006). Concerns about being a health consumer representative: Results of a South Australian study on consumer perspectives. *Australian Journal of Primary Health*, 12(3), 94-103.
- Jolley G., Lawless A., & Hurley C. (2008). Framework and tools for planning and evaluating community participation, collaborative partnerships and equity in health promotion. *Health Promotion Journal of Australia*, 19(2), 152-157.
- Jonas S. (1978). Limitations of community control of health facilities and services. *American Journal of Public Health*, 68(6), 541-543.
- Kamuzora, P., Maluka, S., Ndawi, B., Byskov, J., & Hurtig, A. K. (2013). Promoting community participation in priority setting in district health systems: Experiences from Mbarali district, Tanzania. *Global Health Action*, 6, 22669.
- Kapiriri, L., & Martin, D. K. (2010). Successful priority setting in low and middle income countries: A framework for evaluation. *Health Care Analysis*, 18(2), 129-147.
- Kegler, M. C., Norton, B. L., & Aronson, R. E. (2008). Strengthening community leadership: Evaluation findings from the California healthy cities and communities program. *Health Promotion Practice*, 9(2), 170-179.

- Kemper, C., Blackburn, C., Doyle, J. A., & Hyman, D. (2013). Engaging patients and families in system-level improvement: A safety imperative. *Nursing Administration Quarterly*, 37(3), 203-215.
- Kenny, A., Farmer, J., Dickson-Swift, V., & Hyett, N. (2014). Community participation for rural health: A review of challenges. *Health Expectations*.
- Kenny, A., Hyett, N., Sawtell, J., Dickson-Swift, V., Farmer, J., & O'Meara, P. (2013). Community participation in rural health: A scoping review. *BMC Health Services Research*, 13, 64-6963-13-64.
- Kohler, J. C., & Martinez, M. G. (2015). Participatory health councils and good governance: Healthy democracy in Brazil? *International Journal for Equity in Health*, 14(1), 21.
- Koseki, L. K. (1977). Consumer participation in health maintenance organizations. *Health & Social Work*, 2(4), 50-69.
- Kovacs Burns, K., Bellows, M., Eigenseher, C., & Gallivan, J. (2014). 'Practical' resources to support patient and family engagement in healthcare decisions: A scoping review. *BMC Health Services Research*, 14, 175-6963-14-175.
- Kraus F., Levy J., & Oliviere D. (2003). Brief report on user involvement at St Christopher's hospice. *Palliative Medicine*, 17(4), 375-377.
- Lasker R.D., Weiss E.S., Baker Q.E., Collier A.K., Israel B.A., Plough A., & Bruner C. (2003). Broadening participation in community problem solving: A multidisciplinary model to support collaborative practice and research. *Urban Health*, 80(1), 14-60.
- Leviten-Reid, C., & Hoyt, A. (2009). Community-based home support agencies: Comparing the quality of care of cooperative and non-profit organizations. *Canadian Journal on Aging*, 28(2), 107-120.
- Linhorst, D. M., Eckert, A., & Hamilton, G. (2005). Promoting participation in organizational decision making by clients with severe mental illness. *Social Work*, 50(1), 21-30.
- Litva, A., Canvin, K., Shepherd, M., Jacoby, A., & Gabbay, M. (2009). Lay perceptions of the desired role and type of user involvement in clinical governance. *Health Expectations*, 12(1), 81-91.
- Llewellyn-Jones, L., & Harvey, D. (2005). The development of a health promotion community participation framework. *Australian Journal of Primary Health*, 11(2), 136-146.
- Loewenson, R. (2000). Public participation in health systems in Zimbabwe. *IDS Bulletin*, 31(1), 14-20.
- Mallery, C., Ganachari, D., Fernandez, J., Smeeding, L., Robinson, S., Moon, M., . . . Siegel, J. (2012). *Innovative methods in stakeholder engagement: An environmental scan*. Rockville, MD: Agency for Healthcare Research and Quality.
- Maloff, B., Bilan, D., & Thurston, W. (2000). Enhancing public input into decision making: Development of the Calgary regional health authority public participation framework. *Family & Community Health: The Journal of Health Promotion & Maintenance*, 23(1), 66-78.
- Maluka, S., Kamuzora, P., Sansebastian, M., Byskov, J., Ndawi, B., Olsen, O. E., & Hurtig, A. K. (2011). Implementing accountability for reasonableness framework at district level in Tanzania: A realist evaluation. *Implementation Science*, 6, 11-5908-6-11.
- Martin, D. K., Abelson, J., & Singer, P. A. (2002). Participation in health care priority-setting through the eyes of the participants. *Journal of Health Services Research & Policy*, 7(4), 222-229.
- Martin, G. P. (2008). Representativeness, legitimacy and power in public involvement in health-service management. *Social Science & Medicine*, 67(11), 1757-1765.
- Maxwell C., Aggleton P., & Warwick I. (2008). Involving HIV-positive people in policy and service development: Recent experiences in England. *AIDS Care - Psychological and Socio-Medical Aspects of AIDS/HIV*, 20(1), 72-79.
- McCabe, L., & Bradley, B. E. (2012). Supporting user participation in local policy development: The Fife dementia strategy. *Social Policy and Society*, 11(2), 157-169.

- McDaid, S. (2009). An equality of condition framework for user involvement in mental health policy and planning: Evidence from participatory action research. *Disability & Society*, 24(4), 461-474.
- McGrow, G., & the Scottish Health Council. (2013). *Evaluating participation: A guide and toolkit for health and social care practitioners*. Healthcare Improvement Scotland.
- McIver, S. (1998). *Healthy debate? : An independent evaluation of citizens' juries in health settings*. London: King's Fund.
- Meier B.M., Pardue C., & London L. (2012). Implementing community participation through legislative reform: A study of the policy framework for community participation in the Western Cape province of South Africa. *BMC International Health and Human Rights*, 12(1)
- Mende S., & Roseman D. (2013). The aligning forces for quality experience: Lessons on getting consumers involved in health care improvements. *Health Affairs*, 32(6), 1092-1100.
- Menon, D., & Stafinski, T. (2008). Engaging the public in priority-setting for health technology assessment: Findings from a citizens' jury. *Health Expectations*, 11(3), 282-293.
- Metsch J.M., & Veney J.E. (1976). Consumer participation and social accountability. *Medical Care*, 14(4), 283-293.
- Milewa T., Harrison S., Ahmad W., & Tovey P. (2002). Citizens' participation in primary healthcare planning: Innovative citizenship practice in empirical perspective. *Critical Public Health*, 12(1), 39-53.
- Ministry of Health. (2003). *Toward clinical excellence: A toolkit to develop consumer participation in credentialling*. Wellington: Ministry of Health.
- Mitton, C., Smith, N., Peacock, S., Evoy, B., & Abelson, J. (2009). Public participation in health care priority setting: A scoping review. *Health Policy*, 91(3), 219-228.
- Molnar C. (2001). Addressing challenges, creating opportunities: Fostering consumer participation in Medicaid and children's health insurance managed care programs. *Journal of Ambulatory Care Management*, 24(3), 61-67.
- Mosquera, M., Zapata, Y., Lee, K., Arango, C., & Varela, A. (2001). Strengthening user participation through health sector reform in Colombia: A study of institutional change and social representation. *Health Policy and Planning*, 16 Suppl 2, 52-60.
- Murray, Z. (2015). Community representation in hospital decision making: A literature review. *Australian Health Review*, 39, 323-328.
- Nagel, J. H. (1992). Combining deliberation and fair representation in community health decisions. *University of Pennsylvania Law Review*, 140(5), 1965-1985.
- Nathan S., Harris E., Kemp L., & Harris-Roxas B. (2006). Health service staff attitudes to community representatives on committees. *Journal of Health, Organisation and Management*, 20(6), 551-559.
- North, N., & Werko, S. (2002). Widening the debate? Consultation and participation in local health care planning in the English and Swedish health services. *International Journal of Health Services*, 32(4), 781-798.
- Oakley, P. (1991). *Projects with people: The practice of participation in rural development*. Geneva: International Labour Office.
- O'Keefe E., & Hogg C. (1999). Public participation and marginalized groups: The community development model. *Health Expectations*, 2(4), 245-254.
- O'Mara-Eves, A., Brunton, G., McDaid, D., Oliver, S., Kavanagh, J., Jamal, F., . . . Thomas, J. (2013). Community engagement to reduce inequalities in health: A systematic review, meta-analysis and economic analysis. *Public Health Research*, 1(4)

- O'Meara, W. P., Tsofa, B., Molyneux, S., Goodman, C., & McKenzie, F. E. (2011). Community and facility-level engagement in planning and budgeting for the government health sector--a district perspective from Kenya. *Health Policy*, 99(3), 234-243.
- O'Neill, M. (1992). Community participation in Quebec's health system: A strategy to curtail community empowerment? *International Journal of Health Services*, 22(2), 287-301.
- Organisation for Economic Co-operation and Development. (2005). *Evaluating public participation in policy making*. OECD.
- Osher, T. W., Penn, M., & Spencer, S. A. (2008). Partnerships with families for family-driven systems of care. In B. A. Stroul, G. M. Blau, B. A., pp. 249-273. Baltimore, MD, US: Paul H Brookes Publishing.
- Oxman, A. D., Lewin, S., Lavis, J. N., & Fretheim, A. (2009). SUPPORT tools for evidence-informed health policymaking (STP) 15: Engaging the public in evidence-informed policymaking. *Health Research Policy and Systems*, 7 Suppl 1, S15-4505-7-S1-S15.
- Patient-Centered Outcomes Research Institute. (2014). *Ways of engaging- ENGagement ACTivity tool (WE-ENACT) – researcher 2.0 item pool*. PCORI.
- Patient-Centered Outcomes Research Institute. (2015). *PCORI evaluation framework 2.0*. PCORI.
- Perlstadt, H., Jackson-Elmoore, C., Freddolino, P. P., & Sturdevant Reed, C. (1999). Citizen participation in health planning: A case study of changing delivery systems. *Research in the Sociology of Health Care*, 16, 75-98.
- Pickin, C., Popay, J., Staley, K., Bruce, N., Jones, C., & Gowman, N. (2002). Developing a model to enhance the capacity of statutory organisations to engage with lay communities. *Journal of Health Services Research and Policy*, 7(1), 34-42.
- Ponte, P. R., Conlin, G., Conway, J. B., Grant, S., Medeiros, C., Nies, J., . . . Conley, K. (2003). Making patient-centered care come alive: Achieving full integration of the patient's perspective. *The Journal of Nursing Administration*, 33(2), 82-90.
- Popay, J., Whitehead, M., Carr-Hill, R., Dibben, C., Dixon, P., Halliday, E., . . . Walthery, P. (2015). The impact on health inequalities of approaches to community engagement in the new deal for communities regeneration initiative: A mixed-methods evaluation. *Public Health Research*, 3(12)
- Preston, R., Waugh, H., Larkins, S., & Taylor, J. (2010). Community participation in rural primary health care: Intervention or approach? *Australian Journal of Primary Health*, 16(1), 4-16.
- Principles of community engagement* (2011). (Second edition). Bethesda, MD: National Institutes of Health.
- Quantz, D., & Thurston, W. E. (2006). Representation strategies in public participation in health policy: The aboriginal community health council. *Health Policy*, 75(3), 243-250.
- Ramiro L.S., Castillo F.A., Tan-Torres T., Torres C.E., Tayag J.G., Talampas R.G., & Hawken L. (2001). Community participation in local health boards in a decentralized setting: Cases from the Philippines. *Health Policy and Planning*, 16, 61-69.
- Rasanathan, K., Posayanonda, T., Birmingham, M., & Tangcharoensathien, V. (2012). Innovation and participation for healthy public policy: The first national health assembly in Thailand. *Health Expectations*, 15(1), 87-96.
- Rawlins, M. D. (2005). Pharmacopolitics and deliberative democracy. *Clinical Medicine*, 5(5), 471-475.
- Riddick, C. C., Eisele, T., & Montgomery, A. (1984). The health planning process: Are consumers really in control? *Health Policy*, 4(2), 117-127.
- Rodwin, M. (2000). *Promoting accountable managed health care: The potential role for consumer voice*. Center for Law and Health, Indiana University Law School-Indianapolis.



- Ruano, A. L., Sebastián, M. S., & Hurtig, A. (2014). The process of social participation in primary health care: The case of Palencia, Guatemala. *Health Expectations*, 17(1), 93-103.
- Rummery, K. (2009). Healthy partnerships, healthy citizens? An international review of partnerships in health and social care and patient/user outcomes. *Social Science & Medicine*, 69(12), 1797-1804.
- Rutter D., Manley C., Weaver T., Crawford M.J., & Fulop N. (2004). Patients or partners? Case studies of user involvement in the planning and delivery of adult mental health services in London. *Social Science and Medicine*, 58(10), 1973-1984.
- Sabin, J. A., & Daniels, N. (2002). Managed care: Strengthening the consumer voice in managed care: V. helping professionals listen. *Psychiatric Services*, 53(7), 805-811.
- Schwartz, J. L. (1964). Participation of consumers in prepaid health plans. *Journal of Health and Human Behavior*, 5, 74-84.
- Serapioni, M., & Duxbury, N. (2014). Citizens' participation in the Italian health-care system: The experience of the mixed advisory committees. *Health Expectations*, 17(4), 488-499.
- Shepperd, J. D. (1977). Consumer participation in community health programs: A comparative analysis of two programs. *Journal of the National Medical Association*, 69(2), 115-119.
- Shinn, C. *Meaningful community voice: Advocacy, accountability and autonomy in community health partnerships*. Ph.D. Dissertation, Heller School for Social Policy and Management, Brandeis Univ.
- Sibbald, S. L., Singer, P. A., Upshur, R., & Martin, D. K. (2009). Priority setting: What constitutes success? A conceptual framework for successful priority setting. *BMC Health Services Research*, 9, 43-6963-9-43.
- Sibley Memorial Hospital. (2013). *Patient and family advisory council (PFAC) annual report 2013*. Sibley Memorial Hospital.
- Silvestre, A. J., Faber, J. F., Shankle, M. D., & Kopelman, J. P. (2002). A model for involving youth in health planning: HIV prevention in Pennsylvania. *Perspectives on Sexual and Reproductive Health*, 34(2), 91-97.
- Sitzia J., Cotterell P., & Richardson A. (2006). Interprofessional collaboration with service users in the development of cancer services: The cancer partnership project. *Journal of Interprofessional Care*, 20(1), 60-74.
- South Australian Community Health Research Unit. (2015). *Community participation evaluation tool*. SACHRU.
- Steckler, A., Dawson, L., Dellinger, N., & Williams, A. (1981). Consumer participation and influence in a health systems agency. *Journal of Community Health*, 6(3), 181-193.
- Sullivan M.J.L., & Scattolon Y. (1995). Health policy planning: A look at consumer involvement in Nova Scotia. *Canadian Journal of Public Health*, 86(5), 317-320.
- Tataw, D. B. (2012). Toward a horizontal participatory implementation approach for community health programs serving vulnerable populations. *Journal of Human Behavior in the Social Environment*, 22(4), 421-435.
- Tenbenschel, T. (2002). Interpreting public input into priority-setting: The role of mediating institutions. *Health Policy*, 62(2), 173-194.
- Thurston, W. E., MacKean, G., Vollman, A., Casebeer, A., Weber, M., Maloff, B., & Bader, J. (2005). Public participation in regional health policy: A theoretical framework. *Health Policy*, 73(3), 237-252.
- Turan, J. M., Say, L., Gungor, A. K., Demarco, R., & Yazgan, S. (2003). Community participation for perinatal health in Istanbul. *Health Promotion International*, 18(1), 25-32.

- Vincent-Jones P. (2011). Embedding economic relationships through social learning? The limits of patient and public involvement in healthcare governance in England. *Journal of Law and Society*, 38(2), 215-244.
- Warburton, D., Wilson, R., & Rainbow, E. (2007). *Making a difference: A guide to evaluating public participation in central government*. The Involve Foundation.
- Wasylenko E. (2013). Jugglers, tightrope walkers, and ringmasters: Priority setting, allocation, and reducing moral burden. *Healthcare Management Forum*, 26(2), 77-81.
- Wilhelm, A., & Jackson, K. (2012). *All aboard for patient engagement: A resource kit for patients, providers and leaders*. Alberta Health Services.
- Willcox J., & Gill M. (2007). Integrated disease management programs: Reflections and learnings from implementation. *Australian Journal of Primary Health*, 13(2), 113-120.
- Winder, E., the Value+ Steering Group, Bedlington, N., & Megas, E. (2013). *The value+ toolkit: For patient organisations on meaningful patient involvement*. European Patients' Forum.
- World Health Organization. Division of Mental Health. (1989). *Consumer involvement in mental health and rehabilitation services*. Geneva: World Health Organization.
- Worley, C. G., Mohrman, S. A., & Nevitt, J. A. (2011). Large group interventions: An empirical field study of their composition, process, and outcomes. *Journal of Applied Behavioral Science*, 47(4), 404-431.
- Young, R. (2006). Introducing role and service changes in health and social care: The impact and influence of user involvement in England and Wales. *Social Policy and Society*, 5(2), 249-268.
- Zuidgeest M., Luijkx K.G., Westert G.P., & Delnoij D.M. (2011). Legal rights of client councils and their role in policy of long-term care organisations in the Netherlands. *BMC Health Services Research*, 11, 215.
