# Supplementary material for: Metrics and Evaluation Tools for Patient Engagement in Healthcare Organization- and System-Level Decision-Making: A Systematic Review
Source: PubMed Central journal article supplement (PMC6186472; doi:10.15171/ijhpm.2018.43), 2018-05-16
Supplement: ijhpm-7-889-s005.pdf [file ijhpm-7-889-s005.pdf]

| Metric                                            |                                                                   | Tool (for number correspondence, see Table 1) |    |   |   |   |    |   |   |   |    |    |    |    |    |    |    |    |    |    |    |    |    |    |
|---------------------------------------------------|-------------------------------------------------------------------|-----------------------------------------------|----|---|---|---|----|---|---|---|----|----|----|----|----|----|----|----|----|----|----|----|----|----|
|                                                   |                                                                   | 1                                             | 2  | 3 | 4 | 5 | 6  | 7 | 8 | 9 | 10 | 11 | 12 | 13 | 14 | 15 | 16 | 17 | 18 | 19 | 20 | 21 | 22 | 23 |
| Preconditions for engagement metrics              | Organization or system rewards staff participation in engagement  |                                               |    |   |   |   |    |   |   | √ |    |    |    |    |    |    |    |    |    |    |    |    |    |    |
|                                                   | Staff readiness and attitudes towards engagement                  |                                               | √  |   | √ | √ |    |   | √ | √ | √  |    |    |    |    |    | √  |    |    |    |    | √  |    |    |
|                                                   | Staff have formal job responsibilities related to engagement      |                                               |    |   |   |   |    |   |   |   |    |    |    |    |    |    |    |    |    |    |    | √  |    |    |
|                                                   | <b>** Participation:</b>                                          |                                               | √√ |   |   | √ | √√ | √ |   | √ | √  |    |    | √  | √  | √  |    | √  |    | √  |    |    |    | √  |
|                                                   | Activeness of participation                                       |                                               |    |   |   |   |    |   |   |   |    |    |    | √  |    |    |    |    |    |    |    |    |    | √  |
|                                                   | Equality of participation (among P2C2 participants)               |                                               | √  |   |   | √ | √  |   |   |   |    |    |    | √  |    |    |    |    |    | √  | √  |    |    |    |
|                                                   | Attendance of engagement participants                             |                                               |    |   |   |   |    |   |   |   |    |    |    |    | √  |    |    |    |    |    |    |    |    |    |
|                                                   | Regularity of meetings                                            |                                               |    |   |   |   |    |   |   | √ |    |    |    |    | √  | √  |    | √  |    | √  |    |    |    |    |
|                                                   | P2C2 participants' readiness and attitudes towards engagement     |                                               | √  |   |   | √ | √  | √ |   |   |    |    |    |    |    |    |    |    |    |    |    |    |    |    |
|                                                   | <b>** Tailoring the engagement to P2C2 participants</b>           |                                               |    |   |   |   |    |   |   |   |    |    |    |    |    |    | √  |    |    |    |    |    |    |    |
|                                                   | Cultural beliefs and practices                                    |                                               |    |   |   |   |    |   |   |   |    |    |    |    |    |    | √  |    |    |    |    |    |    |    |
|                                                   | <b>P2C2-initiated engagement</b>                                  |                                               | √  |   |   |   |    |   |   |   |    |    |    |    |    |    |    |    |    |    |    |    |    |    |
|                                                   | <b>** Recruitment and membership:</b>                             |                                               |    | √ |   |   |    |   |   |   |    |    |    |    | √  | √√ | √  | √  | √  | √  |    | √  | √  |    |
|                                                   | Method of recruitment                                             |                                               |    | √ |   |   |    |   |   |   |    |    |    |    | √  | √  |    | √  | √  | √  |    | √  | √  |    |
|                                                   | Number of P2C2 members and P2C2 versus non-P2C2 participant ratio |                                               |    |   |   |   |    |   |   |   |    |    |    |    | √  | √  |    | √  | √  |    |    |    |    |    |
|                                                   | Time or terms mandate for membership                              |                                               |    |   |   |   |    |   |   |   |    |    |    |    | √  |    |    |    |    |    |    |    |    |    |
| <b>** Representativeness and accountability:</b>  |                                                                   | √                                             | √  |   | √ |   |    |   |   | √ |    |    | √  | √  |    | √  | √  | √  |    | √  | √  |    |    |    |
| Constituent representativeness and accountability |                                                                   | √                                             | √  |   |   |   |    |   |   |   |    |    | √  |    |    | √  |    |    |    |    | √  |    |    |    |
| Democratic representativeness                     |                                                                   | √                                             |    |   |   |   |    |   |   |   |    |    | √  |    |    |    |    |    |    |    |    |    |    |    |
| Diversity representativeness                      |                                                                   |                                               | √  |   | √ |   |    |   |   | √ |    |    |    |    |    | √  |    |    |    | √  | √  |    |    |    |

| Metric                                                                                                        | Tool (for number correspondence, see Table 1) |   |   |   |   |    |   |    |   |    |    |    |    |    |    |    |    |    |    |    |    |    |    |
|---------------------------------------------------------------------------------------------------------------|-----------------------------------------------|---|---|---|---|----|---|----|---|----|----|----|----|----|----|----|----|----|----|----|----|----|----|
|                                                                                                               | 1                                             | 2 | 3 | 4 | 5 | 6  | 7 | 8  | 9 | 10 | 11 | 12 | 13 | 14 | 15 | 16 | 17 | 18 | 19 | 20 | 21 | 22 | 23 |
| <b>** Resources provided to P2C2 participants</b>                                                             | √√                                            |   | √ |   | √ | √√ |   | √√ | √ | √  |    | √  | √  | √√ |    | √  | √√ | √  | √√ | √√ | √√ | √  |    |
| Childcare                                                                                                     |                                               |   |   |   |   |    |   |    |   |    |    |    |    | √  |    | √  | √  | √  |    | √  | √  |    |    |
| Financial support                                                                                             |                                               |   |   |   | √ | √  |   |    |   |    |    |    | √  | √  |    | √  | √  | √  |    |    | √  |    |    |
| Meals and refreshments                                                                                        |                                               |   |   |   |   |    |   |    |   |    |    |    |    |    |    |    |    | √  |    |    | √  |    |    |
| Transportation and parking                                                                                    |                                               |   |   |   |   | √  |   |    |   |    |    |    |    | √  |    | √  | √  | √  |    | √  | √  |    |    |
| Translation support                                                                                           |                                               |   |   |   |   |    |   |    |   |    |    |    |    |    |    |    |    | √  |    |    | √  |    |    |
| Meeting place tailored to P2C2 participants                                                                   |                                               |   |   |   |   |    |   |    |   |    |    |    |    |    |    |    |    | √  |    |    | √  |    |    |
| Meeting time tailored to P2C2 participants                                                                    |                                               |   |   |   |   |    |   |    |   |    |    |    |    |    |    |    |    |    | √  |    | √  |    |    |
| Support from other P2C2 participants                                                                          |                                               |   |   |   |   |    |   | √  |   |    |    |    |    | √  |    | √  | √  |    |    |    | √  |    |    |
| Support for disseminating results of the engagement                                                           |                                               |   |   |   | √ |    |   |    |   | √  |    | √  |    | √  |    |    | √  | √  |    |    | √√ | √  |    |
| Staff support of P2C2 involvement in engagement                                                               | √                                             |   |   |   |   | √  |   | √√ | √ |    |    |    | √  | √  |    | √  | √  |    | √  |    | √  |    |    |
| Use of a broader P2C2 needs and strengths assessment to support P2C2 representatives in their decision-making |                                               |   | √ |   |   |    |   |    |   |    |    |    |    |    |    |    |    |    |    |    |    |    |    |
| Feedback from P2C2 complaints                                                                                 |                                               |   |   |   |   |    |   |    |   |    |    |    |    |    |    |    |    |    |    |    |    |    | √  |
| Unbiased, jargon-free information on which to make decisions                                                  | √                                             |   |   |   |   |    |   |    |   |    |    |    | √  | √  |    |    | √  | √  |    | √  |    |    |    |
| <b>** Training (for P2C2 participants)</b>                                                                    |                                               |   |   |   |   |    |   | √√ |   |    |    |    | √  | √  | √  | √  | √  | √  | √  |    |    |    |    |
| Presence of training                                                                                          |                                               |   |   |   |   |    |   |    |   |    |    |    | √  |    | √  | √  |    |    |    |    |    |    |    |
| Quality of training                                                                                           |                                               |   |   |   |   |    |   | √√ |   |    |    |    |    | √  | √  |    |    |    |    |    |    |    |    |
| Scope of training                                                                                             |                                               |   |   |   |   |    |   |    |   |    |    |    |    | √  | √  |    |    | √  |    |    |    |    |    |
| <b>** Training (for staff)</b>                                                                                |                                               |   |   |   |   |    |   |    | √ | √  |    | √  |    |    |    | √  |    |    |    |    |    | √  |    |
| Quality of training                                                                                           |                                               |   |   |   |   |    |   |    |   |    |    |    |    |    |    |    |    |    |    |    |    | √  |    |
| <b>Respect</b>                                                                                                |                                               |   |   |   |   | √  |   |    |   |    |    |    |    |    |    | √  |    |    |    | √  |    |    |    |
| <b>Transparency of the decision-making process</b>                                                            |                                               |   |   |   |   |    |   |    |   |    |    |    |    |    |    |    |    |    |    | √  | √  | √  | √  |
| <b>Trust</b>                                                                                                  |                                               |   |   |   |   |    | √ |    |   |    |    |    |    |    |    |    |    |    |    | √  |    |    |    |
| <b>Level of participation</b>                                                                                 |                                               |   |   |   |   |    |   |    |   |    |    |    | √  |    |    |    |    |    |    |    |    |    | √  |
| Filled out by: External Evaluator                                                                             | E                                             |   | E |   |   |    |   |    |   |    |    |    | E  |    | E  |    |    | E  |    |    |    | E  |    |
| Leader**                                                                                                      |                                               | L |   | L | L | L  | L | L  | L | L  | L  | L  |    | L  | L  | L  | L  |    | L  |    | L  |    | L  |
| P2C2 representative***                                                                                        |                                               | R |   |   | R | R  | R | R  | R | R  | R  |    |    |    |    |    | R  |    | R  | R  |    |    |    |

P2C2 - patient, public, consumer and community.

KEY: √ 1-3 instances, √√ 4-14 instances, √√√ 15 or more instances of coding.

\* Row includes instances of items coded only into the outcome metric category when further specification was not possible.

\*\* Row include instances of items coded only into the subdomain when further specification was not possible.

\*\*\* Individual coded items could be asked of only leaders, only representatives or both; data shown are for tool as whole.

Metrics absent from all tools include:

- Formal power: 1) P2C2 participants are protected from organization retaliation; 2) P2C2 participants have veto power in decision-making.
- Participation: 1) debate intensity; 2) attendance of P2C2 participants who are minorities; 3) substitution of P2C2 participants among attendees.
- Tailoring the engagement to P2C2 participants (needs or beliefs): 1) individual mental health needs; 2) individual health needs.
- Recruitment and membership: 1) consistency of membership (turnover); 2) participants' neutrality; 3) literacy of P2C2 participants.
- Representativeness and accountability: representative legitimacy (non-democratic).
- Resources provided to P2C2 participants: 1) accommodations; 2) meeting facilitator; 3) support from patient advocacy groups or organizations.
- Training for P2C2 participants: training provided is independent of the organization or system (in content or financing).
- Legitimacy of decision-making (an individual subdomain under aggregate process metrics domain).
